# Supplementary material for: NK cell predicts the severity of acute graft-versus-host disease in patients after allogeneic stem cell transplantation using antithymocyte globulin (ATG) in pretreatment scheme
Source: Springer Nature journal article supplement (doi:10.1186/s12865-019-0326-8), 2019-12-01

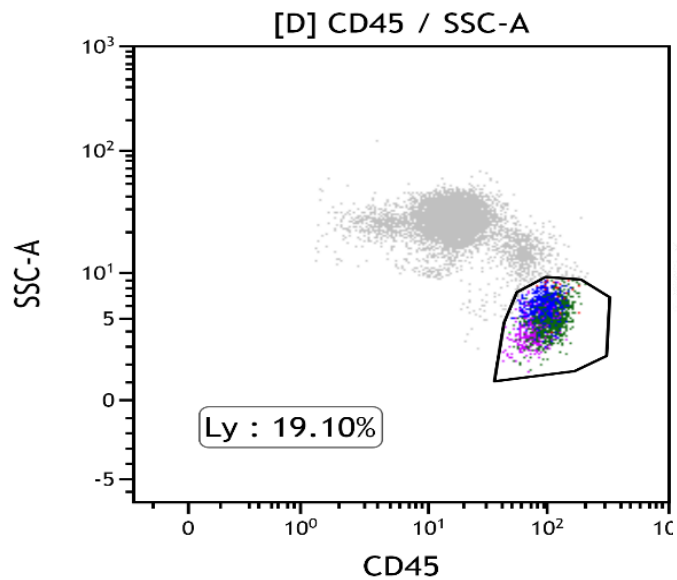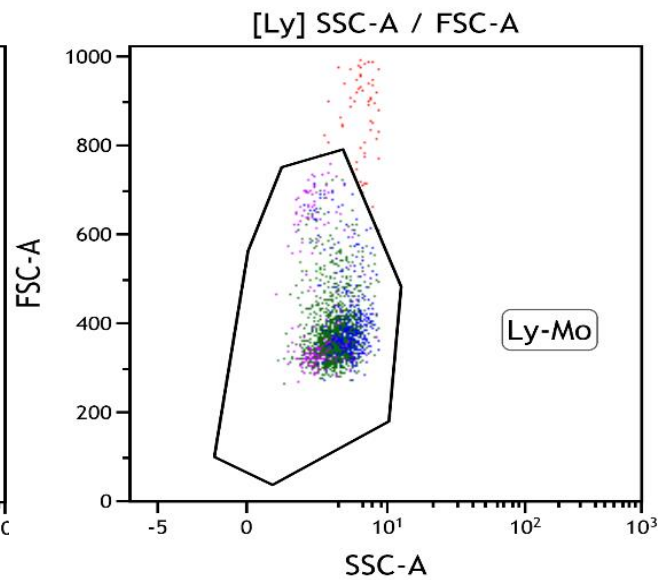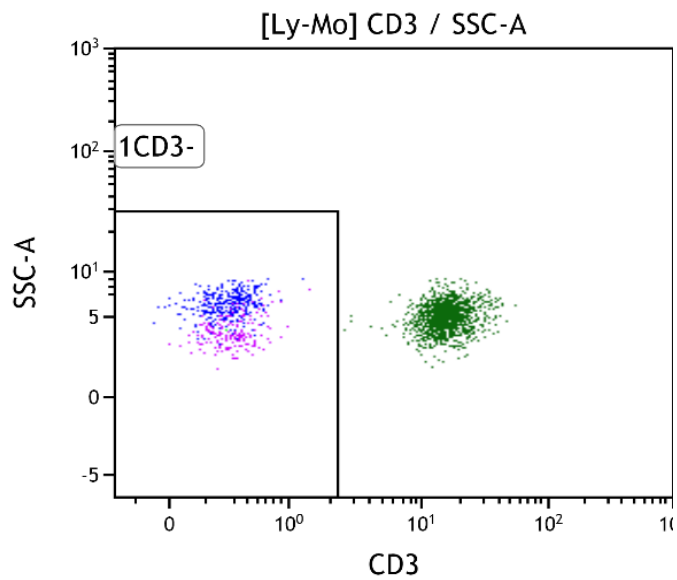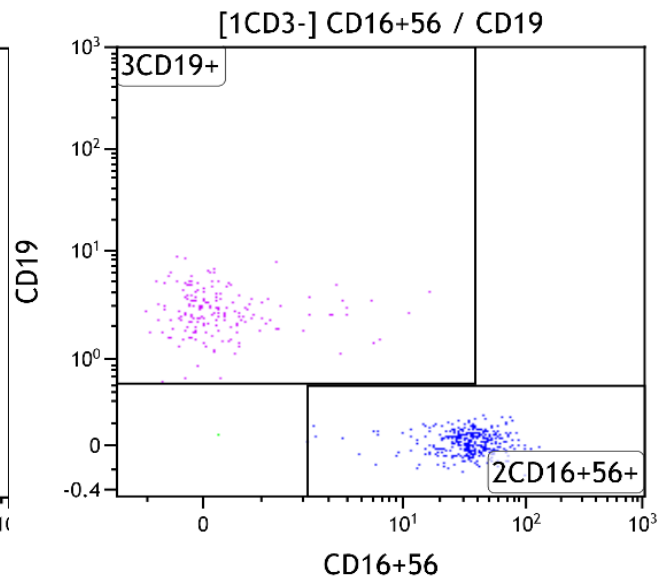

Supplement: MOESM1 [file 17486754]
